# Supplementary material for: Developing a Diagnostic Model to Differentiate the Well-differentiated Lipomatous Tumors Based on Clinicopathological Characteristics
Source: Research Square preprint supplement (doi:10.21203/rs.3.rs-7254061/v1), 2025-08-17
Supplement: Supplementary file 1 [file 7f80cd6413994004465c086c.docx]

**Supplementary Figure 1. Calibration of the Diagnostic Prediction Model**
Calibration curves validated the model’s predictive accuracy for both the training (A) and validation cohorts (B). The close alignment of the predicted probabilities with the observed outcomes, as indicated by the solid line closely following the diagonal reference line, demonstrates high calibration and predictive precision.
